# Supplementary material for: Consolidation and performance gains in plasma-sintered printed nanoelectrodes
Source: Royal Society of Chemistry journal article supplement (doi:10.1039/d3na00293d), 2023-01-01
Supplement: d3na00293d1.pdf [file d3na00293d1.pdf]

# SUPPORTING INFORMATION TO: Consolidation and performance gains in plasma-sintered printed nanoelectrodes

Lukas F. Engel,<sup>†</sup> Lola González-García,<sup>\*,†,‡</sup> and Tobias Kraus<sup>\*,†,¶</sup>

<sup>†</sup>*INM — Leibniz Institute for New Materials, Campus D2 2, 66123 Saarbrücken, Germany*

<sup>‡</sup>*Department of Materials Science and Engineering, Saarland University, Campus D2 2,  
66123 Saarbrücken, Germany*

<sup>¶</sup>*Colloid and Interface Chemistry, Saarland University, Campus D2 2, 66123 Saarbrücken,  
Germany*

E-mail: lola.gonzalez-garcia@leibniz-inm.de; tobias.kraus@leibniz-inm.de

# 1 Comparing optical transmittance and electric conductance of different grids

We determined the sheet resistance  $R_{sh}$  as resistance  $R$  of a quadratic electrode section with edge length  $l = 15\,000\ \mu\text{m}$ , used Ag paste for contacting and miniature crocodile clamps for two-point probe measurements. The square area contained 750 conducting lines. Its anisotropic sheet resistance was

$$R_{sh}^{-1} = R^{-1} = G = \sigma_{shell} \cdot \frac{750 \cdot A_{shell}}{l}, \quad (\text{S1})$$

measured parallel to the lines, with  $G$  being the conductance of the 750 lines in parallel.

To restrict the influence of  $R_{sh}$  data points at the lowest concentration  $c_{Au}$  (they were off-the-charts) when fitting the trade-off between sheet resistance and optical transmittance, the relation above was used for fitting  $R_{sh}^{-1} = G$  vs.  $\bar{T}_{400-800\text{ nm}}$  instead of  $R_{sh}$  vs.  $\bar{T}_{400-800\text{ nm}}$ . Thus, the fits in Fig. S1B correspond to the inverse of the linear fits in Fig. S1A.

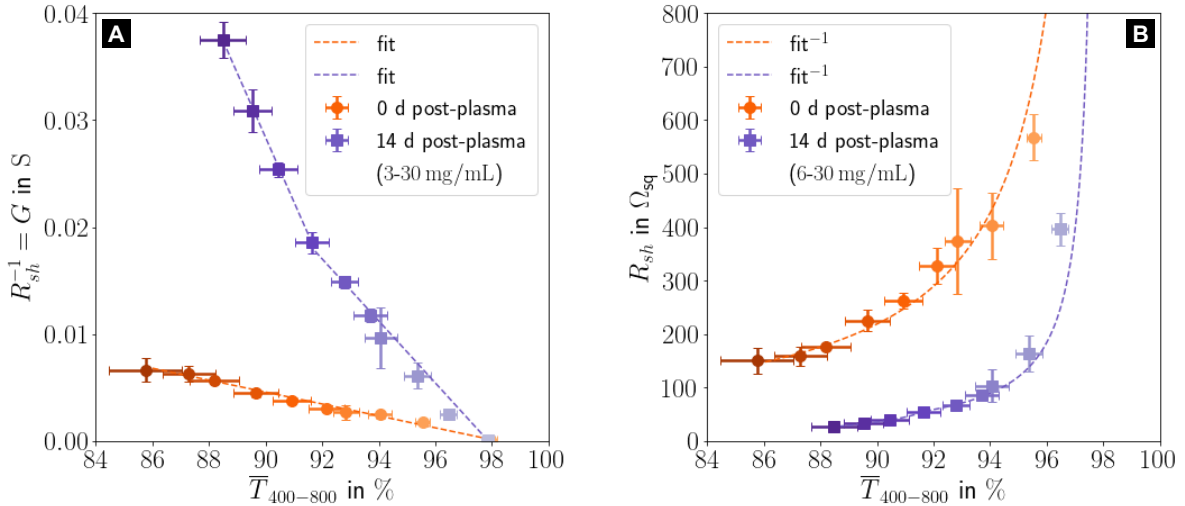

Figure S1: Trade-off between (A) conductance  $G = R_{sh}^{-1}$  and optical transmittance  $\bar{T}_{400-800}$  as well as (B) between sheet resistance  $R_{sh}$  and optical transmittance  $\bar{T}_{400-800}$  for electrodes right after plasma sintering (initial state) and fourteen days later (aged state). The data points for  $c_{Au} = 3\text{ mg/mL}$  have been omitted in B due to off-the-charts high  $R_{sh}$ . | The graphs show averaged values from three measurements each, the corresponding standard deviation as well as a fit (dashed lines). Light colours indicate lower  $c_{Au}$ .

## 2 Quantification of electrode ageing

We tracked the sheet resistance of AuNP electrodes imprinted at ink concentrations ranging from 3 mg/mL to 30 mg/mL on PET foil over time to investigate their ageing behaviour. Nanoimprinting at 3 mg/mL resulted in structures near the percolation threshold, exhibiting initial sheet resistances which were too high for FTEs.

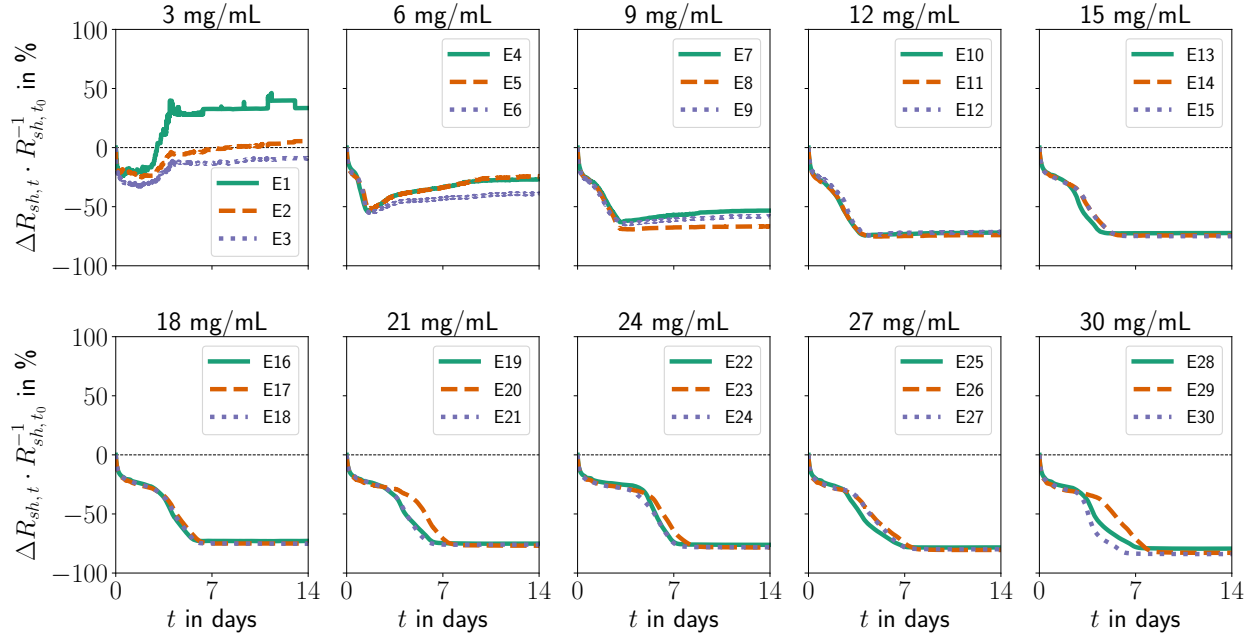

Figure S2: Relative change in sheet resistance  $(R_{sh,t} - R_{sh,t_0}) \cdot R_{sh,t_0}^{-1} = \Delta R_{sh,t} \cdot R_{sh,t_0}^{-1}$  with time  $t$  for three electrodes each, nanoimprinted at the respectively same concentration  $c_{Au}$ .

In addition, we measured the optical transmittance spectra of the FTEs immediately after plasma sintering and 14 days later for all concentrations.

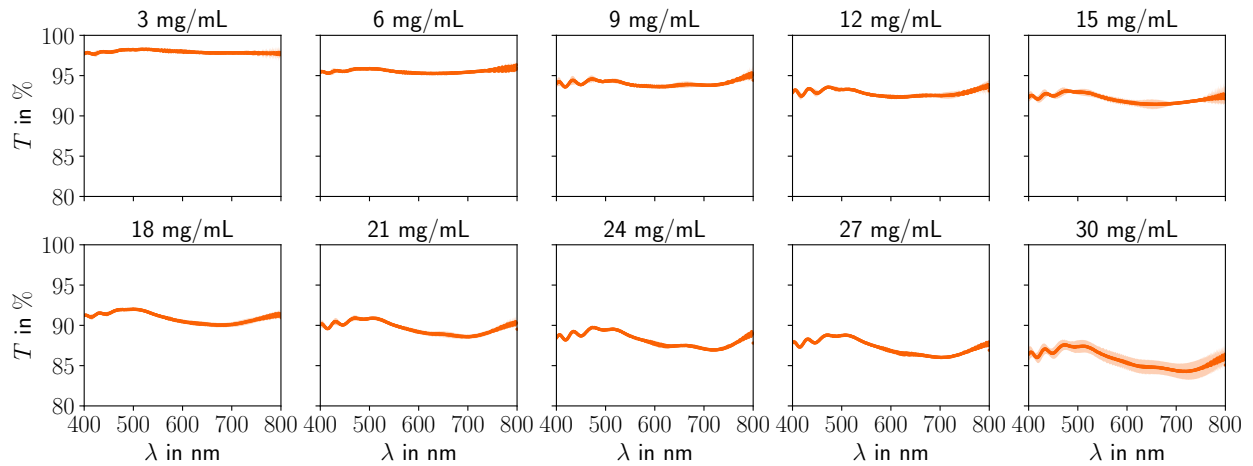

Figure S3: Optical transmittance spectra of the FTEs immediately after plasma sintering. Each graph shows the average from measurements on three FTEs imprinted at the same concentration  $c_{Au}$  as well as the standard deviation.

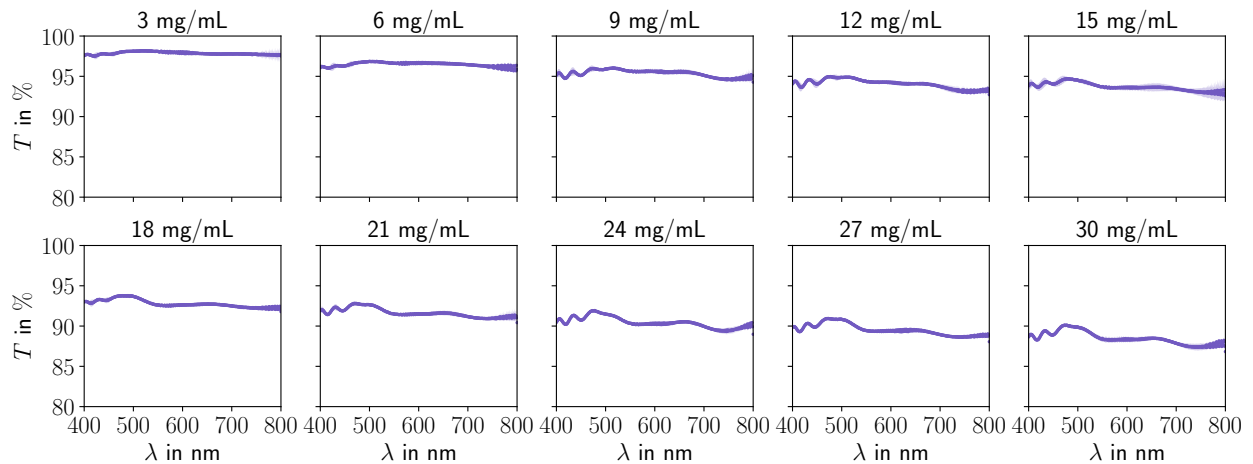

Figure S4: Optical transmittance spectra of the FTEs 14 days after plasma sintering. Each graph shows the average from measurements on three FTEs imprinted at the same concentration  $c_{Au}$  as well as the standard deviation.

### 3 Sphere properties

#### 3.1 Core sizes and dispersion states

SAXS was employed to study the AuNP dispersion state within the whole concentration range used for nanoimprinting and to determine the average AuNP core diameter  $d_{sp}$ .

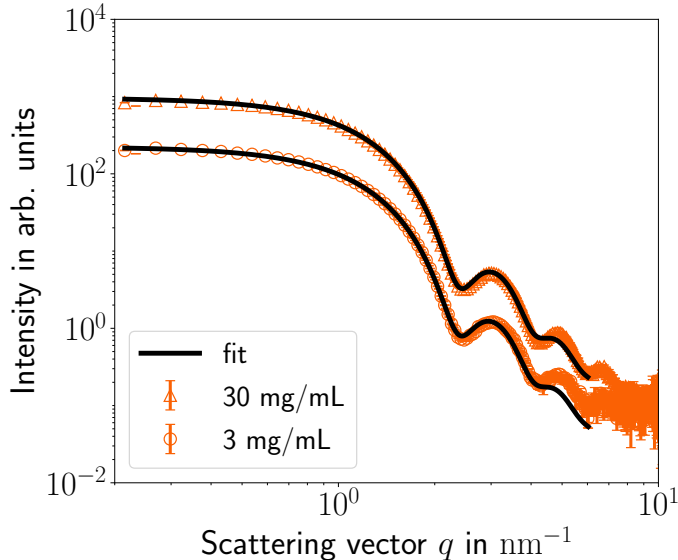

Figure S5: Radially integrated, fitted SAXS curves of the AuNPs used for nanoimprinting at both the highest (30 mg/mL) and the lowest concentration (3 mg/mL). The fits yield a core size of  $d_{sp} = 3.7 \text{ nm} \pm 10 \%$ . Agglomeration peaks are not present.

#### 3.2 Core center-to-centre distance and sphere arrangement after imprinting

Small-Angle X-ray Scattering (SAXS) was employed to study the spheres' structural arrangement within lines nanoimprinted at  $c_{Au} = 3 \text{ mg/mL}$  and  $30 \text{ mg/mL}$ . The single peak position  $q^*$  suggests an amorphous sphere arrangement. Based on the Ehrenfest relation,<sup>1,2</sup> the core center-to-center distance for spheres with a short range order (amorphous arrangement) corresponds to:

$$a_{c-c}^{amorph} = \frac{2\pi}{q^*} \cdot 1.23 = 5.61 \pm 0.07 \text{ nm} \quad (\text{S2})$$

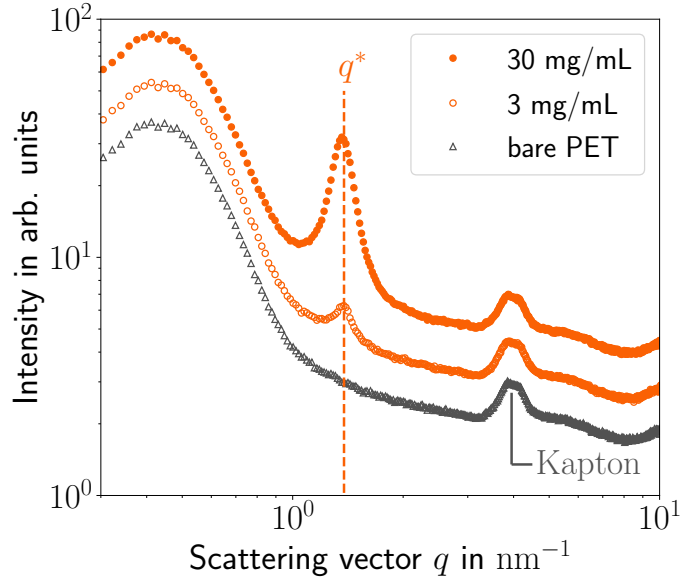

Figure S6: Radially integrated SAXS curves of electrodes nanoimprinted at 30 mg/mL (highest concentration) and 3 mg/mL (lowest concentration) on PET as well as of the bare PET as reference (the Kapton<sup>®</sup> peak is due to the Kapton<sup>®</sup> window separating sample and evacuated scattering path | scattering curves are shifted for improved visibility).

### 3.3 Organic content

The organic content of the synthesized and twice-purified Au nanospheres was determined with Thermogravimetric Analysis (TGA) and amounted to 16.98 wt% (see Fig. S7). This corresponds to a volume fraction of:

$$f_{V,OAm} = \frac{f_{w,OAm} \cdot (\rho_{OAm})^{-1}}{f_{w,OAm} \cdot (\rho_{OAm})^{-1} + f_{w,Au} \cdot (\rho_{Au})^{-1}} \cdot 100 \% \approx 80.79 \text{ vol\%} \quad (\text{S3})$$

with  $f_{V,OAm}$  the volume fraction of OAm,  $f_{w,OAm} \approx 15 \text{ wt\%}$  the mass fraction of OAm,  $f_{w,Au} \approx 85 \text{ wt\%}$  the mass fraction of Au,  $\rho_{OAm} = 0.81 \text{ g/cm}^3$  the density of OAm<sup>3</sup> and  $\rho_{Au} = 19.3 \text{ g/cm}^3$  the density of Au,<sup>4</sup> both at room temperature.

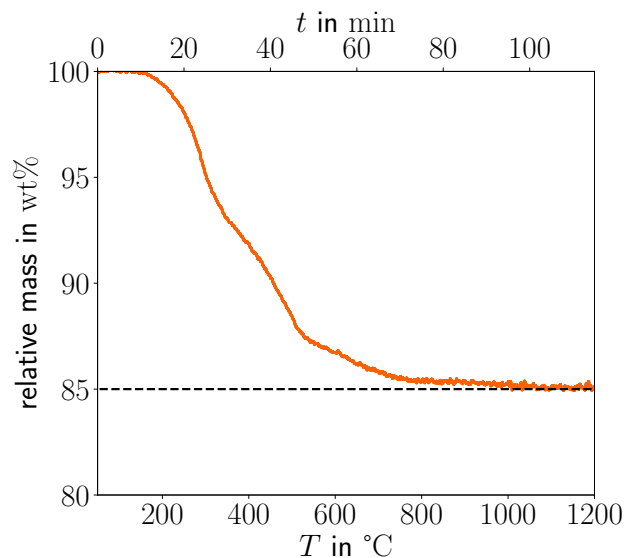

Figure S7: TGA of the synthesized and twice purified AuNPs.

## References

1. Guinier, A.; Fournet, G. *Small-Angle Scattering of X-Rays*; John Wiley & Sons, Inc.: New York, 1955.
2. Feng, R.; Stachurski, Z. H.; Rodriguez, M. D.; Kluth, P.; Araujo, L. L.; Bulla, D.; Ridgway, M. C. X-ray scattering from amorphous solids. *Journal of Non-Crystalline Solids* **2014**, *383*, 21–27, DOI: 10.1016/j.jnoncrysol.2013.04.070.
3. Oleylamine, approximate C18-content 80-90%: SDS. 2009; <https://www.fishersci.de/store/msds?partNumber=10400380&productDescription=100ML+Oleylamine%2C+approximate+C18-content+80-90%25&countryCode=DE&language=de>.
4. Haynes, W. M., Ed. *CRC Handbook of chemistry and physics: A ready-reference book of chemical and physical data*, 97th ed.; CRC Press: Boca Raton and London and New York, 2017.
